# Supplementary material
Source: Springer Nature journal article supplement (https://www.springermedizin.de/resource/supplementary/13033_2012_135_MOESM2_ESM.pdf/9651916)

# Measures and Interventions

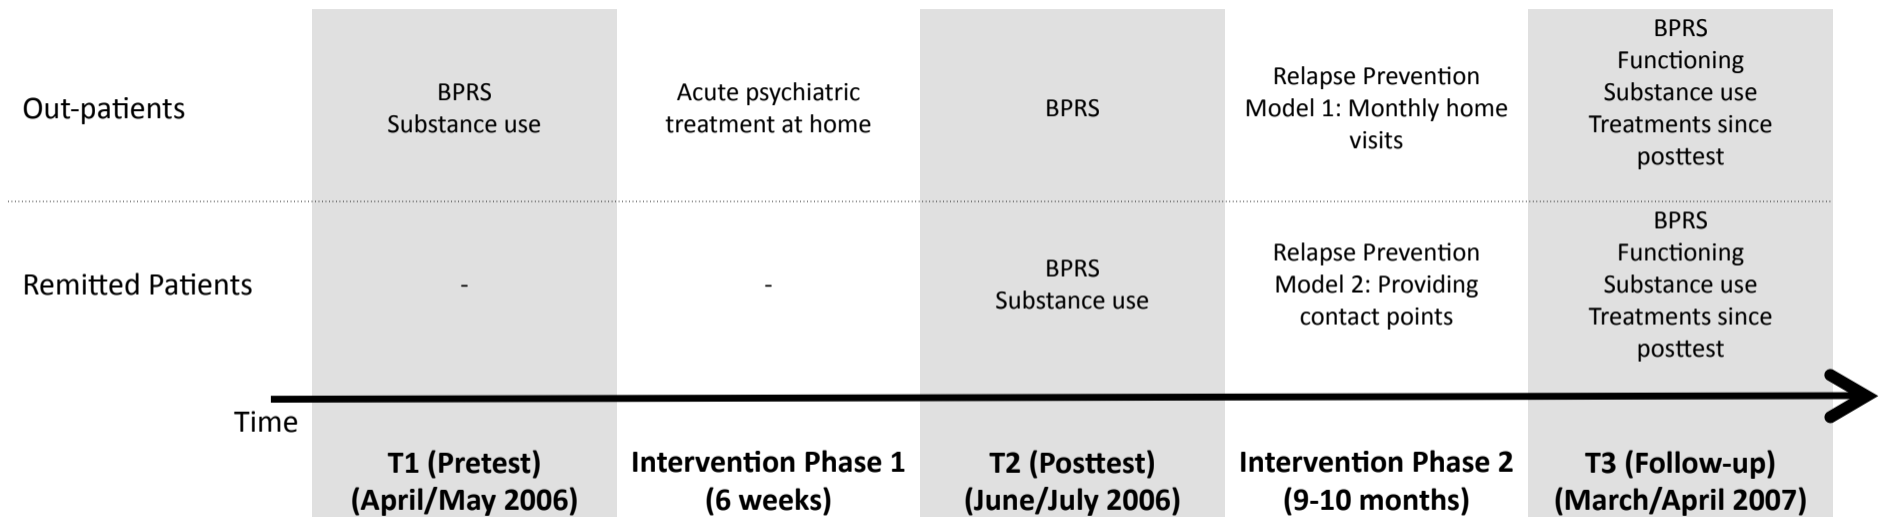

## Phases of the Study

Supplement: MOESM2 [file 9651916]
